# Supplementary material
Source: publisher figshare collection journal article supplement (https://acs.figshare.com/ndownloader/files/5191753)
Supplement: Supplementary file 1 [file 5191753]

 
data_ma2 
  
_audit_creation_method            SHELXL 
_chemical_name_systematic 
; 
 ? 
; 
_chemical_name_common             ? 
_chemical_formula_moiety          ? 
_chemical_formula_structural      ? 
_chemical_formula_analytical      ? 
_chemical_formula_sum             'C23 H21 N O5 S' 
_chemical_formula_weight          423.47 
_chemical_melting_point           ? 
_chemical_compound_source         ? 
  
loop_ 
 _atom_type_symbol 
 _atom_type_description 
 _atom_type_scat_dispersion_real 
 _atom_type_scat_dispersion_imag 
 _atom_type_scat_source 
 'C'  'C'   0.0033   0.0016 
 'International Tables Vol C Tables 4.2.6.8 and 6.1.1.4' 
 'H'  'H'   0.0000   0.0000 
 'International Tables Vol C Tables 4.2.6.8 and 6.1.1.4' 
 'N'  'N'   0.0061   0.0033 
 'International Tables Vol C Tables 4.2.6.8 and 6.1.1.4' 
 'O'  'O'   0.0106   0.0060 
 'International Tables Vol C Tables 4.2.6.8 and 6.1.1.4' 
 'S'  'S'   0.1246   0.1234 
 'International Tables Vol C Tables 4.2.6.8 and 6.1.1.4' 
  
_symmetry_cell_setting            Triclinic 
_symmetry_space_group_name_H-M    P1 
  
loop_ 
 _symmetry_equiv_pos_as_xyz 
 'x, y, z' 
  
_cell_length_a                    7.889(5) 
_cell_length_b                    8.294(5) 
_cell_length_c                    8.727(5) 
_cell_angle_alpha                 79.70(5) 
_cell_angle_beta                  74.71(4) 
_cell_angle_gamma                 87.15(5) 
_cell_volume                      541.9(5) 
_cell_formula_units_Z             1 
_cell_measurement_temperature     298(2) 
_cell_measurement_reflns_used     93 
_cell_measurement_theta_min       9.27 
_cell_measurement_theta_max       15.21 
  
_exptl_crystal_description        ? 
_exptl_crystal_colour             ? 
_exptl_crystal_size_max           0.18 
_exptl_crystal_size_mid           0.18 
_exptl_crystal_size_min           0.22 
_exptl_crystal_density_meas       ? 
_exptl_crystal_density_diffrn     1.298 
_exptl_crystal_density_method     ? 
_exptl_crystal_F_000              222 
_exptl_absorpt_coefficient_mu     0.183 
_exptl_absorpt_correction_type    empirical 
_exptl_absorpt_correction_T_min   0.2697 
_exptl_absorpt_correction_T_max   0.3465 
  
_exptl_special_details 
; 
 ? 
; 
  
_diffrn_ambient_temperature       298(2) 
_diffrn_radiation_wavelength      0.71073 
_diffrn_radiation_type            MoK\a 
_diffrn_radiation_source          'fine-focus sealed tube' 
_diffrn_radiation_monochromator   graphite 
_diffrn_measurement_device        'Siemens P4' 
_diffrn_measurement_method        '2\q/\w scans' 
_diffrn_standards_number          3 
_diffrn_standards_interval_count  97 
_diffrn_standards_interval_time   ? 
_diffrn_standards_decay_%         4.31 
_diffrn_reflns_number             2602 
_diffrn_reflns_av_R_equivalents   0.0000 
_diffrn_reflns_av_sigmaI/netI     0.0115 
_diffrn_reflns_limit_h_min        -6 
_diffrn_reflns_limit_h_max        6 
_diffrn_reflns_limit_k_min        -8 
_diffrn_reflns_limit_k_max        8 
_diffrn_reflns_limit_l_min        -9 
_diffrn_reflns_limit_l_max        9 
_diffrn_reflns_theta_min          2.46 
_diffrn_reflns_theta_max          22.50 
_reflns_number_total              2602 
_reflns_number_observed           2483 
_reflns_observed_criterion        >2sigma(I) 
  
_computing_data_collection        'Siemens XSCANS' 
_computing_cell_refinement        'Siemens XSCANS' 
_computing_data_reduction         'Siemens SHELXTL' 
_computing_structure_solution     'SHELXS-86 (Sheldrick, 1990)' 
_computing_structure_refinement   'SHELXL-93 (Sheldrick, 1993)' 
_computing_molecular_graphics     'Siemens SHELXTL' 
_computing_publication_material   'Siemens SHELXTL' 
  
_refine_special_details 
; 
 Refinement on F^2^ for ALL reflections except for 0 with very negative F^2^ 
 or flagged by the user for potential systematic errors.  Weighted R-factors 
 wR and all goodnesses of fit S are based on F^2^, conventional R-factors R 
 are based on F, with F set to zero for negative F^2^. The observed criterion 
 of F^2^ > 2sigma(F^2^) is used only for calculating _R_factor_obs etc. and is 
 not relevant to the choice of reflections for refinement.  R-factors based 
 on F^2^ are statistically about twice as large as those based on F, and R- 
 factors based on ALL data will be even larger. 
; 
  
_refine_ls_structure_factor_coef  Fsqd 
_refine_ls_matrix_type            full 
_refine_ls_weighting_scheme 
 'calc w=1/[\s^2^(Fo^2^)+(0.1000P)^2^+0.0000P] where P=(Fo^2^+2Fc^2^)/3' 
_atom_sites_solution_primary      direct 
_atom_sites_solution_secondary    difmap 
_atom_sites_solution_hydrogens    geom 
_refine_ls_hydrogen_treatment     ? 
_refine_ls_extinction_method      none 
_refine_ls_extinction_coef        ? 
_refine_ls_abs_structure_details 
 'Flack H D (1983), Acta Cryst. A39, 876-881' 
_refine_ls_abs_structure_Flack    0.03(6) 
_refine_ls_number_reflns          2602 
_refine_ls_number_parameters      280 
_refine_ls_number_restraints      3 
_refine_ls_R_factor_all           0.0319 
_refine_ls_R_factor_obs           0.0297 
_refine_ls_wR_factor_all          0.0874 
_refine_ls_wR_factor_obs          0.0835 
_refine_ls_goodness_of_fit_all    0.815 
_refine_ls_goodness_of_fit_obs    0.800 
_refine_ls_restrained_S_all       0.815 
_refine_ls_restrained_S_obs       0.799 
_refine_ls_shift/esd_max          0.000 
_refine_ls_shift/esd_mean         0.000 
  
loop_ 
 _atom_site_label 
 _atom_site_type_symbol 
 _atom_site_fract_x 
 _atom_site_fract_y 
 _atom_site_fract_z 
 _atom_site_U_iso_or_equiv 
 _atom_site_thermal_displace_type 
 _atom_site_occupancy 
 _atom_site_calc_flag 
 _atom_site_refinement_flags 
 _atom_site_disorder_group 
S1 S 0.90218(8) 0.11948(6) 0.63807(6) 0.0511(2) Uani 1 d . . 
N1 N 1.1641(3) 0.5712(2) 0.6346(2) 0.0414(5) Uani 1 d . . 
H1A H 1.1056(3) 0.6518(2) 0.5967(2) 0.050 Uiso 1 calc R . 
O1 O 0.9779(4) -0.1660(3) 0.4756(3) 0.0778(7) Uani 1 d . . 
O2 O 1.1472(3) 0.3276(2) 0.7993(2) 0.0596(5) Uani 1 d . . 
O3 O 1.5549(4) 0.7146(4) 0.6956(5) 0.1034(10) Uani 1 d . . 
O4 O 1.2977(3) 0.8310(3) 0.6990(3) 0.0810(7) Uani 1 d . . 
O5 O 1.2273(3) 0.1674(2) 0.0782(2) 0.0661(6) Uani 1 d . . 
H5A H 1.2091(3) 0.2135(2) -0.0073(2) 0.099 Uiso 1 calc R . 
C1 C 0.9412(5) -0.2016(4) 0.1720(4) 0.0681(8) Uani 1 d . . 
H1B H 1.0393(5) -0.2530(4) 0.1992(4) 0.082 Uiso 1 calc R . 
C2 C 0.8897(6) -0.2382(5) 0.0414(5) 0.0824(11) Uani 1 d . . 
H2A H 0.9556(6) -0.3113(5) -0.0202(5) 0.099 Uiso 1 calc R . 
C3 C 0.7425(5) -0.1671(4) 0.0030(4) 0.0702(9) Uani 1 d . . 
H3A H 0.7074(5) -0.1927(4) -0.0835(4) 0.084 Uiso 1 calc R . 
C4 C 0.6484(5) -0.0591(4) 0.0924(4) 0.0627(9) Uani 1 d . . 
H4A H 0.5480(5) -0.0112(4) 0.0669(4) 0.075 Uiso 1 calc R . 
C5 C 0.6992(4) -0.0190(3) 0.2203(3) 0.0528(7) Uani 1 d . . 
H5B H 0.6336(4) 0.0560(3) 0.2796(3) 0.063 Uiso 1 calc R . 
C6 C 0.8478(4) -0.0901(3) 0.2608(3) 0.0465(7) Uani 1 d . . 
C7 C 0.9040(4) -0.0575(3) 0.4023(3) 0.0473(6) Uani 1 d . . 
C8 C 0.8756(3) 0.1017(3) 0.4516(3) 0.0437(6) Uani 1 d . . 
C9 C 0.8463(4) 0.2529(3) 0.3696(3) 0.0506(7) Uani 1 d . . 
H9A H 0.8285(4) 0.2692(3) 0.2668(3) 0.061 Uiso 1 calc R . 
C10 C 0.8457(4) 0.3799(3) 0.4547(3) 0.0542(7) Uani 1 d . . 
H10A H 0.8287(4) 0.4893(3) 0.4140(3) 0.065 Uiso 1 calc R . 
C11 C 0.8725(3) 0.3276(3) 0.6042(3) 0.0444(6) Uani 1 d . . 
C12 C 0.8840(4) 0.4314(3) 0.7272(3) 0.0488(7) Uani 1 d . . 
H12A H 0.8436(4) 0.5423(3) 0.6930(3) 0.059 Uiso 1 calc R . 
C13 C 0.7707(5) 0.3657(5) 0.8955(4) 0.0752(10) Uani 1 d . . 
H13A H 0.6503(5) 0.3615(5) 0.8925(4) 0.113 Uiso 1 calc R . 
H13B H 0.7808(5) 0.4366(5) 0.9684(4) 0.113 Uiso 1 calc R . 
H13C H 0.8097(5) 0.2575(5) 0.9317(4) 0.113 Uiso 1 calc R . 
C14 C 1.0752(4) 0.4403(3) 0.7257(3) 0.0404(6) Uani 1 d . . 
C15 C 1.3523(3) 0.5855(3) 0.5959(3) 0.0427(6) Uani 1 d . . 
H15A H 1.3997(3) 0.4800(3) 0.6372(3) 0.051 Uiso 1 calc R . 
C16 C 1.4128(5) 0.7160(3) 0.6702(3) 0.0506(7) Uani 1 d . . 
C17 C 1.3461(7) 0.9641(5) 0.7659(6) 0.0959(13) Uani 1 d . . 
H17A H 1.2508(7) 1.0411(5) 0.7818(6) 0.144 Uiso 1 calc R . 
H17B H 1.4485(7) 1.0179(5) 0.6928(6) 0.144 Uiso 1 calc R . 
H17C H 1.3710(7) 0.9214(5) 0.8674(6) 0.144 Uiso 1 calc R . 
C18 C 1.4294(4) 0.6218(3) 0.4125(3) 0.0528(7) Uani 1 d . . 
H18A H 1.3902(4) 0.7296(3) 0.3712(3) 0.063 Uiso 1 calc R . 
H18B H 1.5565(4) 0.6247(3) 0.3897(3) 0.063 Uiso 1 calc R . 
C19 C 1.3790(4) 0.4989(3) 0.3241(3) 0.0476(7) Uani 1 d . . 
C20 C 1.3455(4) 0.5515(4) 0.1741(3) 0.0532(7) Uani 1 d . . 
H20A H 1.3570(4) 0.6621(4) 0.1291(3) 0.064 Uiso 1 calc R . 
C21 C 1.2957(4) 0.4439(3) 0.0908(3) 0.0544(7) Uani 1 d . . 
H21A H 1.2734(4) 0.4828(3) -0.0088(3) 0.065 Uiso 1 calc R . 
C22 C 1.2787(4) 0.2799(3) 0.1533(3) 0.0482(6) Uani 1 d . . 
C23 C 1.3115(4) 0.2243(3) 0.3022(3) 0.0508(7) Uani 1 d . . 
H23A H 1.2994(4) 0.1136(3) 0.3469(3) 0.061 Uiso 1 calc R . 
C24 C 1.3620(4) 0.3330(3) 0.3843(3) 0.0519(7) Uani 1 d . . 
H24A H 1.3854(4) 0.2934(3) 0.4833(3) 0.062 Uiso 1 calc R . 
  
loop_ 
 _atom_site_aniso_label 
 _atom_site_aniso_U_11 
 _atom_site_aniso_U_22 
 _atom_site_aniso_U_33 
 _atom_site_aniso_U_23 
 _atom_site_aniso_U_13 
 _atom_site_aniso_U_12 
S1 0.0662(5) 0.0440(4) 0.0492(3) -0.0020(3) -0.0292(3) -0.0037(3) 
N1 0.042(2) 0.0366(10) 0.0482(11) -0.0032(8) -0.0203(9) 0.0025(8) 
O1 0.101(2) 0.0530(11) 0.100(2) -0.0122(11) -0.0668(14) 0.0187(11) 
O2 0.0725(15) 0.0507(11) 0.0613(11) 0.0035(9) -0.0352(10) -0.0033(9) 
O3 0.071(2) 0.102(2) 0.178(3) -0.072(2) -0.073(2) 0.0170(14) 
O4 0.078(2) 0.0702(13) 0.128(2) -0.0535(13) -0.0649(15) 0.0241(12) 
O5 0.089(2) 0.0618(12) 0.0624(12) -0.0219(10) -0.0385(11) 0.0069(11) 
C1 0.058(2) 0.070(2) 0.086(2) -0.030(2) -0.025(2) 0.0072(15) 
C2 0.080(3) 0.088(2) 0.088(2) -0.050(2) -0.013(2) -0.009(2) 
C3 0.085(3) 0.076(2) 0.057(2) -0.0102(15) -0.027(2) -0.028(2) 
C4 0.076(2) 0.058(2) 0.062(2) -0.0028(14) -0.036(2) -0.015(2) 
C5 0.056(2) 0.0462(14) 0.063(2) -0.0075(12) -0.0285(14) -0.0025(12) 
C6 0.046(2) 0.0403(13) 0.0562(15) -0.0056(11) -0.0182(12) -0.0080(11) 
C7 0.040(2) 0.0457(14) 0.0589(14) -0.0028(11) -0.0216(12) -0.0007(11) 
C8 0.039(2) 0.0441(14) 0.0528(14) -0.0037(11) -0.0229(11) -0.0027(11) 
C9 0.059(2) 0.0484(15) 0.0525(15) -0.0022(12) -0.0317(13) -0.0015(12) 
C10 0.062(2) 0.0421(14) 0.066(2) -0.0034(12) -0.0337(14) 0.0019(12) 
C11 0.035(2) 0.0504(15) 0.0502(14) -0.0079(11) -0.0142(11) -0.0097(11) 
C12 0.044(2) 0.0474(14) 0.0552(15) -0.0112(11) -0.0117(12) -0.0001(12) 
C13 0.071(3) 0.084(2) 0.064(2) -0.026(2) 0.006(2) -0.020(2) 
C14 0.048(2) 0.0386(13) 0.0389(12) -0.0104(10) -0.0165(11) 0.0021(12) 
C15 0.037(2) 0.0418(13) 0.0545(15) -0.0104(11) -0.0206(12) 0.0029(11) 
C16 0.050(2) 0.052(2) 0.057(2) -0.0115(12) -0.0249(13) -0.0013(14) 
C17 0.125(4) 0.064(2) 0.135(3) -0.051(2) -0.079(3) 0.021(2) 
C18 0.043(2) 0.057(2) 0.061(2) -0.0117(12) -0.0159(13) -0.0066(12) 
C19 0.041(2) 0.0526(15) 0.0493(14) -0.0120(11) -0.0086(11) -0.0004(11) 
C20 0.049(2) 0.059(2) 0.050(2) -0.0055(12) -0.0116(12) -0.0090(12) 
C21 0.057(2) 0.064(2) 0.0441(14) -0.0095(13) -0.0169(12) -0.0022(13) 
C22 0.040(2) 0.058(2) 0.0525(15) -0.0201(12) -0.0146(11) 0.0034(12) 
C23 0.055(2) 0.0482(14) 0.0532(15) -0.0131(11) -0.0206(12) 0.0097(12) 
C24 0.059(2) 0.055(2) 0.0472(14) -0.0119(12) -0.0221(13) 0.0056(13) 
  
_geom_special_details 
; 
 All esds (except the esd in the dihedral angle between two l.s. planes) 
 are estimated using the full covariance matrix.  The cell esds are taken 
 into account individually in the estimation of esds in distances, angles 
 and torsion angles; correlations between esds in cell parameters are only 
 used when they are defined by crystal symmetry.  An approximate (isotropic) 
 treatment of cell esds is used for estimating esds involving l.s. planes. 
; 
  
loop_ 
 _geom_bond_atom_site_label_1 
 _geom_bond_atom_site_label_2 
 _geom_bond_distance 
 _geom_bond_site_symmetry_2 
 _geom_bond_publ_flag 
S1 C11 1.713(3) . ? 
S1 C8 1.727(3) . ? 
N1 C14 1.333(3) . ? 
N1 C15 1.439(4) . ? 
O1 C7 1.223(3) . ? 
O2 C14 1.238(3) . ? 
O3 C16 1.198(4) . ? 
O4 C16 1.295(4) . ? 
O4 C17 1.446(4) . ? 
O5 C22 1.364(3) . ? 
C1 C6 1.373(4) . ? 
C1 C2 1.391(5) . ? 
C2 C3 1.368(6) . ? 
C3 C4 1.357(5) . ? 
C4 C5 1.378(4) . ? 
C5 C6 1.386(4) . ? 
C6 C7 1.489(4) . ? 
C7 C8 1.449(4) . ? 
C8 C9 1.370(4) . ? 
C9 C10 1.392(4) . ? 
C10 C11 1.367(4) . ? 
C11 C12 1.514(4) . ? 
C12 C14 1.510(4) . ? 
C12 C13 1.524(4) . ? 
C15 C16 1.512(4) . ? 
C15 C18 1.535(4) . ? 
C18 C19 1.508(4) . ? 
C19 C24 1.382(4) . ? 
C19 C20 1.393(4) . ? 
C20 C21 1.377(4) . ? 
C21 C22 1.371(4) . ? 
C22 C23 1.386(4) . ? 
C23 C24 1.379(4) . ? 
  
loop_ 
 _geom_angle_atom_site_label_1 
 _geom_angle_atom_site_label_2 
 _geom_angle_atom_site_label_3 
 _geom_angle 
 _geom_angle_site_symmetry_1 
 _geom_angle_site_symmetry_3 
 _geom_angle_publ_flag 
C11 S1 C8 92.28(13) . . ? 
C14 N1 C15 123.7(2) . . ? 
C16 O4 C17 117.2(3) . . ? 
C6 C1 C2 120.3(3) . . ? 
C3 C2 C1 120.4(3) . . ? 
C4 C3 C2 119.4(3) . . ? 
C3 C4 C5 121.1(3) . . ? 
C4 C5 C6 120.2(3) . . ? 
C1 C6 C5 118.6(3) . . ? 
C1 C6 C7 118.8(3) . . ? 
C5 C6 C7 122.5(2) . . ? 
O1 C7 C8 120.0(3) . . ? 
O1 C7 C6 119.2(3) . . ? 
C8 C7 C6 120.8(2) . . ? 
C9 C8 C7 131.5(2) . . ? 
C9 C8 S1 110.0(2) . . ? 
C7 C8 S1 118.2(2) . . ? 
C8 C9 C10 113.7(2) . . ? 
C11 C10 C9 113.2(2) . . ? 
C10 C11 C12 127.6(2) . . ? 
C10 C11 S1 110.8(2) . . ? 
C12 C11 S1 121.6(2) . . ? 
C14 C12 C11 107.6(2) . . ? 
C14 C12 C13 111.5(2) . . ? 
C11 C12 C13 112.7(2) . . ? 
O2 C14 N1 121.9(2) . . ? 
O2 C14 C12 121.4(2) . . ? 
N1 C14 C12 116.6(2) . . ? 
N1 C15 C16 113.3(2) . . ? 
N1 C15 C18 110.4(2) . . ? 
C16 C15 C18 109.0(2) . . ? 
O3 C16 O4 123.7(3) . . ? 
O3 C16 C15 123.1(3) . . ? 
O4 C16 C15 113.2(3) . . ? 
C19 C18 C15 114.0(2) . . ? 
C24 C19 C20 116.7(2) . . ? 
C24 C19 C18 123.6(2) . . ? 
C20 C19 C18 119.8(2) . . ? 
C21 C20 C19 121.7(3) . . ? 
C22 C21 C20 120.6(2) . . ? 
O5 C22 C21 123.5(2) . . ? 
O5 C22 C23 117.6(3) . . ? 
C21 C22 C23 118.9(3) . . ? 
C24 C23 C22 120.1(3) . . ? 
C23 C24 C19 122.1(2) . . ? 
  
_refine_diff_density_max    0.137 
_refine_diff_density_min   -0.129 
_refine_diff_density_rms    0.027 
  
  
  
